# Supplementary material
Source: Research Square preprint supplement (doi:10.21203/rs.3.rs-9735738/v1)
Supplement: Supplementary file 2 [file 5fdced831e80571b7b5d9bc1.xlsx]

## Sheet: Anemia Factor
Authors	associated factor	AOR	LCI	UCI	Log_LcI	LogU_CI	Log_AOR	Stan_error
Geta TG et al.,2022	Women with low dietary diversity	2.61	1.85	3.68	0.615186	1.30291	0.95935	0.175441
Fite MB et al.,2021	Women with low dietary diversity	3.59	2.44	5.28	0.891998	1.66393	1.27815	0.19692
Fite MB et al.,2021	Women who had no toke feso4 supplementation	1.82	1.22	2.7	0.198851	0.993252	0.598837	0.202653
Geta TG et al.,2022	Women who had no toke feso4 supplementation	1.53	1.3	1.81	0.262364	0.593327	0.425268	0.0844292
Azzam A et al .,2025	Women who had no toke feso4 supplementation	2.59	1.19	5.66	0.173953	1.73342	0.951658	0.397824
Azzam A et al .,2025	women with intestinal parasites	1.38	1.18	1.61	0.165514	0.476234	0.322083	0.0792652
Geta TG et al.,2022	women with intestinal parasites	2.18	1.66	2.87	0.506818	1.05431	0.779325	0.139667
Fite MB et al.,2021	women with intestinal parasites	3.59	2.44	5.28	0.891998	1.66393	1.27815	0.19692
Geta TG et al.,2022	Malaria infection	1.96	1.55	2.48	0.438255	0.908259	0.672944	0.119899
Kassa GM et al .,2017	Malaria infection	1.94	1.33	2.82	0.285179	1.03674	0.662688	0.191724
Adam I et al .,2018	Malaria infection	1.94	1.33	2.82	0.285179	1.03674	0.662688	0.191724
Geta TG et al.,2022	women in the third trimester pregnancy	1.19	1.01	1.32	0.00995033	0.277632	0.173953	0.0682861
Fite MB et al.,2021	women in the third trimester pregnancy	2.37	1.78	3.24	0.576613	1.17557	0.86289	0.152796
Kassa GM et al .,2017	Women who had short pregnancy interval	2.14	1.67	2.74	0.512824	1.00796	0.760806	0.12631
Geta TG et al.,2022	Women who had short pregnancy interval	1.55	1.31	1.83	0.270027	0.604316	0.438255	0.0852778
Azzam A et al .,2025	Women who had short pregnancy interval	2.04	1.18	3.51	0.165514	1.25562	0.71295	0.278087

## Sheet: Anemia Prevalance
Authors	Study_year	Study_area	Sampling method	Sample_size	Anemia (%)	Stan_error	log_prevalence	Stan_Log_prevalence
Geta TG et al.,2022	2022	Ethiopia	SR&MA	28542	26.4	0.260915	3.27336	3.46313
Kassa GM et al .,2017	2017	Ethiopia	SR&MA	10281	31.66	0.458749	3.45505	3.24591
Adam I et al .,2018	2018	Sudan	SR&MA	15688	53	0.398477	3.97029	2.68211
Azzam A et al .,2025	2025	Egypt	SR&MA	14548	49	0.414459	3.89182	2.76286
Mude ASA et al.,2025	2025	Africa	SR&MA	79572	29.2	0.161186	3.37417	3.34148
Dorsamy V et al.,2022	2022	South Africa	SR&MA	4584	31	0.683098	3.43399	3.27062
Bongomin F et al .,2021	2021	Uganda	SR&MA	5113	30	0.640873	3.4012	3.30934
Nageye YA et al.,2024	2024	Somalia	SR&MA	3998	39.7	0.773807	3.68135	2.98857
Belete NK et al.,2025	2025	SSA	SR&MA	51923	51.26	0.219357	3.93691	2.71623
Fite MB et al.,2021	2021	SSA	SR&MA	15061	35.6	0.390158	3.57235	3.11066
