# Supplementary material
Source: Research Square preprint supplement (doi:10.21203/rs.3.rs-9735738/v1)
Supplement: Supplementary file 3 [file 90571ba5be77d06afddf8060.docx]

**Searching strategies**

**Google Scholar:** ("systematic review" OR "meta-analysis") AND ("magnitude of anemia" OR "prevalence of anemia’’ OR "anemia of pregnancy" OR "pregnancy anemia") AND ("pregnant women" OR "antenatal women" OR "pregnant mothers" OR maternal) AND ("associated factors" OR determinants OR "risk factors" OR predictors OR prevalence OR magnitude) AND (Africa OR "Sub-Saharan Africa" OR "East Africa" OR "West Africa" OR "North Africa" OR "South Africa" OR "African countries")

**PubMed:**(((((((((((((((((((("systematic review"[Title/Abstract] OR "meta-analysis"[Title/Abstract] OR "systematic review" OR "meta-analysis") AND ("anemia" OR "magnitude of anemia" OR "anemia of pregnancy" OR "maternal anemia" OR "pregnancy anemia" OR " anemia" AND ("pregnant" OR "pregnancy" OR "antenatal" OR "maternal") AND ("risk factors" OR "associated factors" OR determinants OR prevalence OR magnitude OR burden OR predictors) AND (Africa OR "Sub-Saharan Africa" OR "East Africa" OR "West Africa" OR "North Africa" OR "Southern Africa" OR "African countries")))))))))))))))))))) Filtered in the last 10 years, Abstract, Free full article, Meta-analysis, Systematic Review

**Science Direct:** ("systematic review" OR "meta-analysis") AND ("anemia of pregnant women") AND ("associated factors") AND ("Africa" OR "East Africa" OR "West Africa" OR "North Africa" OR "Southern Africa")

**Hinari:** (((((((((((((((("systematic review" OR "meta-analysis" OR "systematic reviews") AND ("magnitude of anemia" OR "anemia" OR "anemia of pregnancy" OR "pregnancy anemia") AND ("pregnant women" OR "antenatal women" OR "maternal") AND ("associated factors" OR "related factors" OR "risk factors" OR determinants OR predictors OR prevalence) AND ("Africa" OR "Sub-Saharan Africa" OR "East Africa" OR "West Africa" OR "North Africa" OR "South Africa"))))))))))))))))
